# Supplementary material for: Error or exemption to the rule? Development of a diagnostic check for thermochemistry of metal–organic compounds
Source: Royal Society of Chemistry journal article supplement (doi:10.1039/d0ra06880b), 2020-01-01
Supplement: d0ra06880b1.pdf [file d0ra06880b1.pdf]

*Electronic supporting information*

RSC Advances 2020

**Error or exemption to the rule?**

**Development of a diagnostic check for thermochemistry of metal-organic compounds**

Kseniya V. Zherikova,<sup>a,\*</sup> Sergey P. Verevkin,<sup>b,c,\*</sup>

<sup>a</sup>*Nikolaev Institute of Inorganic Chemistry of Siberian Branch of Russian Academy of Sciences, 630090 Novosibirsk, Russia*

<sup>b</sup>*Chemical Technological Department, Samara State Technical University, Samara 443100, Russia*

<sup>c</sup>*Department of Physical Chemistry and Department of „Science and Technology of Life, Light and Matter“, University of Rostock, 18059, Rostock, Germany*

**Table S1** Compilation of phase transition parameters and heat capacities of imidazolium based ionic liquids (IL)

| IL                                                   | $C_{p,m}^{\circ}(\text{cr})(298\text{ K})$<br>J·K <sup>-1</sup> ·mol <sup>-1</sup> | $C_{p,m}^{\circ}(\text{liq})(298\text{ K})$<br>J·K <sup>-1</sup> ·mol <sup>-1</sup> | $\Delta_{cr}^l C_{p,m}^{\circ}$<br>J·K <sup>-1</sup> ·mol <sup>-1</sup> |
|------------------------------------------------------|------------------------------------------------------------------------------------|-------------------------------------------------------------------------------------|-------------------------------------------------------------------------|
| [C <sub>2</sub> C <sub>1</sub> Im][Br]               | 207.5 <sup>1</sup>                                                                 | 245.0 <sup>1</sup>                                                                  | -38                                                                     |
| [C <sub>2</sub> C <sub>1</sub> Im][NO <sub>3</sub> ] | 262.1 <sup>2</sup>                                                                 | 293.4 <sup>2</sup>                                                                  | -31                                                                     |

**Table S2** Compilation of available experimental fusion temperatures and enthalpies  $\Delta_{cr}^l H_m^o(T_{fus})$  for *tris*( $\beta$ -diketonato)iron(III) complexes.<sup>a</sup>

| Complex                 | $T_{fus}/K$      | Ref.    | $\Delta_{cr}^l H_m^o(T_{fus})/kJ \cdot mol^{-1}$ | $\Delta_{cr}^l H_m^o(298.15 K)^b /kJ \cdot mol^{-1}$ |
|-------------------------|------------------|---------|--------------------------------------------------|------------------------------------------------------|
| Fe(acac) <sub>3</sub>   | 454              | Ref. 3  | (25.9±0.5)                                       |                                                      |
|                         | 461              | Ref. 4  | 34.1±0.9                                         |                                                      |
|                         | 462              | Ref. 5  | (22.6±0.5)                                       |                                                      |
|                         | 460              | Ref. 6  | (25.3±1.0)                                       |                                                      |
|                         | 459              | Ref. 6  | 30.1±0.5                                         |                                                      |
|                         | 459 <sup>c</sup> |         | 31.0±0.9 <sup>d</sup>                            | 20.5±3.3                                             |
| Fe(Meacac) <sub>3</sub> | 461              | Ref. 7  | 31.8±3.0 <sup>e</sup>                            | 19.7±4.7                                             |
| Fe(tfac) <sub>3</sub>   | 388              | Ref. 8  |                                                  |                                                      |
|                         | 387              | Ref. 9  |                                                  |                                                      |
|                         | 389              | Ref. 10 |                                                  |                                                      |
|                         | 391              | Ref. 11 |                                                  |                                                      |
|                         | 389 <sup>c</sup> |         | 38.0±5.5 <sup>f</sup>                            | 31.2±5.4 <sup>g</sup>                                |
| Fe(hfac) <sub>3</sub>   | 327              | Ref. 12 |                                                  |                                                      |
|                         | 331              | Ref. 10 |                                                  |                                                      |
|                         | 331              | Ref. 13 |                                                  |                                                      |
|                         | 328              | Ref. 14 |                                                  |                                                      |
|                         | 329 <sup>c</sup> |         | 31.3±3.6 <sup>f</sup>                            | 28.5±3.5 <sup>g</sup>                                |
| Fe(ba) <sub>3</sub>     | 493              | Ref. 10 |                                                  |                                                      |
|                         | 498              | Ref. 15 |                                                  |                                                      |
|                         | 497              | Ref. 16 |                                                  |                                                      |
|                         | 496 <sup>c</sup> |         | 34.2±3.0 <sup>e</sup>                            | 17.4±5.9                                             |
| Fe(dbm) <sub>3</sub>    | 548              | Ref. 17 |                                                  |                                                      |
|                         | 530              | Ref. 12 |                                                  |                                                      |
|                         | 538              | Ref. 13 |                                                  |                                                      |
|                         | 538              | Ref. 10 |                                                  |                                                      |
|                         | 539 <sup>c</sup> |         | 37.3±3.0 <sup>e</sup>                            | 12.2±8.1                                             |
| Fe(thd) <sub>3</sub>    | 440              | Ref. 18 |                                                  |                                                      |
|                         | 437              | Ref. 19 |                                                  |                                                      |
|                         | 437              | Ref. 9  |                                                  |                                                      |
|                         | 438 <sup>c</sup> |         | 30.8±5.9 <sup>f</sup>                            | 14.6±3.4 <sup>g</sup>                                |

<sup>a</sup> Uncertainties in this table are expressed as expanded uncertainties at a level of confidence of 0.95,  $k=2$ .

<sup>b</sup> The enthalpies of fusion,  $\Delta_{cr}^l H_m^o$ , at  $T_{fus}$  were adjusted to 298.15 K (see Eq. 6). Uncertainties in the temperature adjustment of fusion enthalpies from  $T_{fus}$  to the reference temperature are estimated to account with 30 % to the total adjustment.<sup>20</sup>

<sup>c</sup> Average value.

<sup>d</sup> Weighted mean value. We used the experimental uncertainty as the weighing factor. Values in parenthesis were excluded from the calculation of the mean.

<sup>e</sup> Calculated by the multiplication of the fusion temperature,  $T_{fus}$ , with the *Walden constant*  $69 \pm 2$   $J \cdot K^{-1} \cdot mol^{-1}$  with uncertainty assessed to be  $\pm 3.0$   $kJ \cdot mol^{-1}$

<sup>f</sup> The enthalpies of fusion,  $\Delta_{cr}^l H_m^o$ , at 298.15 K derived as the difference between experimental sublimation and vaporization enthalpies (see Table 1, column 5, values in bold) were adjusted to  $T_{fus}$ . Uncertainties in the temperature adjustment of fusion enthalpies from the reference temperature to  $T_{fus}$  are estimated to account with 30 % to the total adjustment.<sup>20</sup>

<sup>g</sup> The enthalpies of fusion,  $\Delta_{cr}^l H_m^o$ , at 298.15 K were calculated as the differences  $\Delta_{cr}^g H_m^o(298.15 \text{ K}) - \Delta_l^g H_m^o(298.15 \text{ K})$  (see Eq. 7) taken from Table 1 (column 5, values in bold).

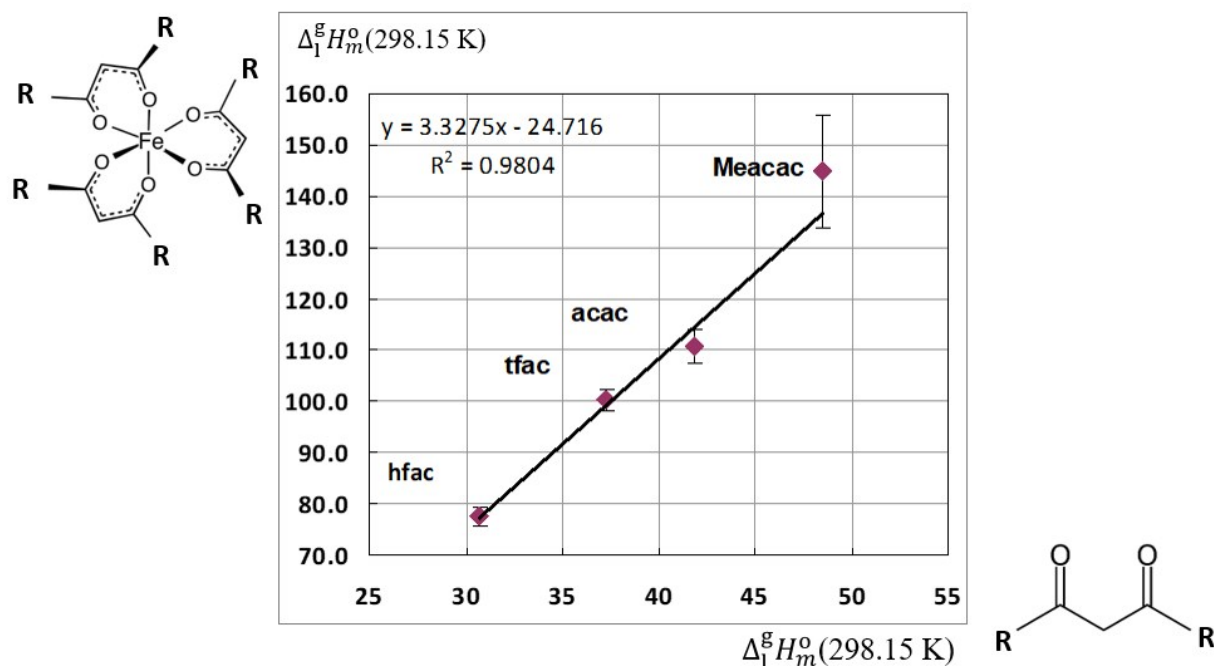

**Fig. S1.** Correlation of vaporization enthalpies of ligand molecules with vaporization enthalpies of *tris*( $\beta$ -diketonato)iron(III) complexes at 298.15 K

**Table S3** Compilation of vaporization enthalpies,  $\Delta_l^g H_m^o(298.15 \text{ K})$ , used for parametrization of the group-additivity method (in  $\text{kJ}\cdot\text{mol}^{-1}$ )<sup>a</sup>

| compound                       | $\Delta_l^g H_m^o(298.15 \text{ K})$ | Ref.     |
|--------------------------------|--------------------------------------|----------|
| trans-4,6-dimethyl-1,3-dioxane | 42.5±0.6                             | Ref. 21  |
| benzene                        | 33.9±0.1                             | Ref. 22  |
| cyclohexene                    | 33.6±0.2                             | Ref. 23  |
| cyclohexane                    | 33.1±0.2                             | Ref. 23  |
| toluene                        | 38.1±0.1                             | Ref. 22  |
| methylcyclohexene              | 35.4±0.2                             | Ref. 23  |
| 1,2,3-trimethylbenzene         | 49.1±0.2                             | Ref. 23  |
| 1,2,3-trimethylcyclohexane     | 43.3±0.5                             | Table S4 |
| trifluoromethylbenzene         | 37.7±0.2                             | Ref. 23  |
| biphenyl                       | 65.5±0.8                             | Ref. 24  |
| tert-butylbenzene              | 47.5±0.4                             | Ref. 25  |
| ferrocene                      | 60.9±1.9                             | Ref. 26  |

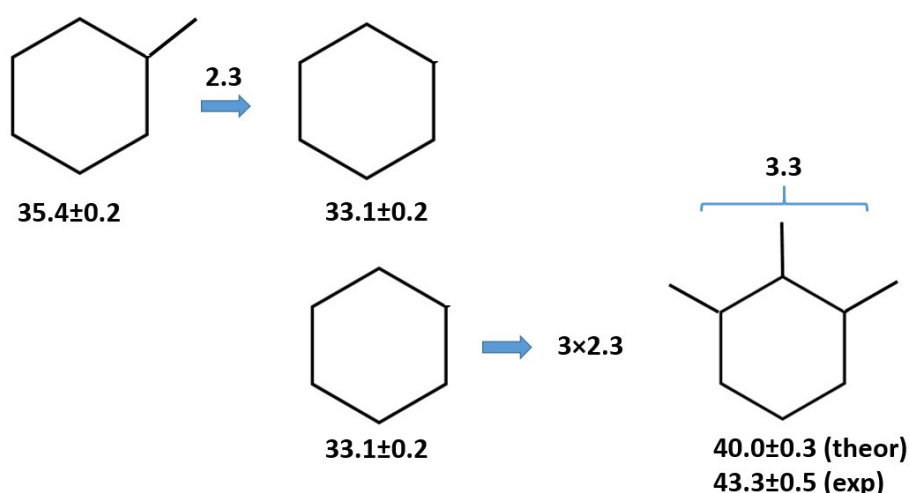

**Fig. S2** Estimation of the [1,2,3-CH<sub>3</sub>] group contribution from arrangement of three CH<sub>3</sub>-groups in the sequence 1,2,3 on the r aliphatic ring, based on vaporization enthalpies (in kJ·mol<sup>-1</sup>) of 1,2,3-trimethylcyclohexane, cyclohexane, and methylcyclohexane (see Table S3)

**Table S4** Correlation of vaporization enthalpies,  $\Delta_1^{\text{g}}H_m^{\circ}(298.15 \text{ K})$ , of substituted cyclohexanes with their Kovats's indices on OV-101.

| Compound                                    | $J_x$ <sup>a</sup> | $\Delta_1^{\text{g}}H_m^{\circ}(298.15 \text{ K})_{\text{exp}}$ <sup>b</sup> | $\Delta_1^{\text{g}}H_m^{\circ}(298.15 \text{ K})_{\text{calc}}$ <sup>c</sup> | $\Delta$ <sup>d</sup> |
|---------------------------------------------|--------------------|------------------------------------------------------------------------------|-------------------------------------------------------------------------------|-----------------------|
|                                             |                    | kJ·mol <sup>-1</sup>                                                         |                                                                               | kJ·mol <sup>-1</sup>  |
| cyclohexane                                 | 654.6              | 33.1                                                                         | 32.7                                                                          | 0.4                   |
| methylcyclohexane                           | 719.4              | 35.4                                                                         | 35.6                                                                          | -0.2                  |
| ethylcyclohexane                            | 830.1              | 40.6                                                                         | 40.4                                                                          | 0.2                   |
| 1,2-dimethylcyclohexane<br>( <i>trans</i> ) | 795.1              | 38.4                                                                         | 38.9                                                                          | -0.5                  |
| 1,2-dimethylcyclohexane ( <i>cis</i> )      | 825.0              | 39.7                                                                         | 40.2                                                                          | -0.5                  |
| 1,3-dimethylcyclohexane ( <i>cis</i> )      | 775.0              | 38.3                                                                         | 38.0                                                                          | 0.3                   |
| 1,2,3-trimethylcyclohexane                  | <b>897.7</b>       |                                                                              | <b>43.3</b>                                                                   |                       |
| 1,4-dimethylcyclohexane<br>( <i>trans</i> ) | 776.7              | 38.0                                                                         | 38.1                                                                          | -0.1                  |
| n-propylcyclohexane                         | 926.4              | 45.1                                                                         | 44.6                                                                          | 0.5                   |
| 1,3-dimethylcyclohexane<br>( <i>trans</i> ) | 802.2              | 39.2                                                                         | 39.2                                                                          | 0.0                   |
| 1,4-dimethylcyclohexane ( <i>cis</i> )      | 802.2              | 39.1                                                                         | 39.2                                                                          | -0.1                  |
| 1,3,5-trimethylcyclohexane                  | 835.0              | 40.2                                                                         | 40.6                                                                          | -0.4                  |

<sup>a</sup> Data on OV-101.<sup>27</sup>

<sup>b</sup> Experimental data from ref. 23.

<sup>c</sup> Calculated using equation:

$$\Delta_1^{\text{g}}H_m^{\circ}(298.15 \text{ K}) / (\text{kJ} \cdot \text{mol}^{-1}) = 4.17 + 0.0436 \times J_x \text{ with } (R^2 = 0.987) \quad (\text{Eq. S1})$$

<sup>d</sup> Difference between experimental and calculated by Eq. S1 values.

It is well established, that the vaporization enthalpies correlate linearly with Kovats's indices<sup>28</sup> in different homologous series of alkanes, alcohols, aliphatic ethers, alkylbenzenes<sup>29</sup> or in a series of structurally parent compounds. We have collected Kovats's indices for a series alkyl-

substituted cyclohexanes, reported for the OV-101 capillary column<sup>27</sup> (see Tables S3-S4) for correlation with  $\Delta_1^{\text{g}}H_{\text{m}}^{\circ}(298.15 \text{ K})$  values of alkyl-substituted cyclohexanes with well-established experimental vaporization data<sup>23</sup>. As expected, the selected set of the  $\Delta_1^{\text{g}}H_{\text{m}}^{\circ}(298.15 \text{ K})$  values have linearly correlated with  $J_x$  values:

$$\Delta_1^{\text{g}}H_{\text{m}}^{\circ}(298.15 \text{ K}) / (\text{kJ}\cdot\text{mol}^{-1}) = 4.17 + 0.0436 \times J_x \text{ with } (R^2 = 0.987) \quad (\text{S1})$$

This correlation has been used to estimate  $\Delta_1^{\text{g}}H_{\text{m}}^{\circ}(298.15 \text{ K}) = 43.3 \text{ kJ}\cdot\text{mol}^{-1}$  for 1,2,3-trimethylcyclohexane (see Table S4) in order obtain specific correction to vaporization enthalpy of the six-membered ring, which have been applied for calculation of vaporization enthalpy of  $\text{Fe}(\text{Meacac})_3$  (see Table 5)

## References

1. Y.U. Paulechka, G.J. Kabo, A.V. Blokhin, A.S. Shaplov, E.I. Lozinskaya and Ya.S. Vygodskii, *J. Chem. Thermodyn.*, 2007, **39**, 158-166.
2. V. Štejfá, J. Rohlíček and C. Červinka, *J. Chem. Thermodyn.*, 2020, **142**, 106020.
3. T.P. Melia and R. Merrifield, *J. Inorg. Nucl. Chem.*, 1970, **32**, 2573-2579.
4. G. Beech and R.M. Lintonbon, *Thermochim. Acta*, 1971, **3**, 97-105.
5. J.P. Murray and J.O. Hill, *Thermochim. Acta*, 1984, **72**, 341-347.
6. J. Sabolovic, Z. Mrak, S. Kostrun and A. Janekovic, *Inorg. Chem.*, 2004, **43**, 8479-8489.
7. E.V. Dose, K.M. Murphy, L.J. Wilson, *Inorg. Chem.*, 1976, **15**, 2622-2630.
8. E.W. Berg and J.T. Truemper, *Analyt. Chem. Acta.*, 1965, **32**, 245-252.
9. K.M. Armstrong and P. Kilian, *Eur. J. Inorg. Chem.*, 2011, 2138-2147.
10. M.M. Conradie and J. Conradie, *Electrochim. Acta*, 2015, **152**, 512-519.
11. N. Matsubara and T. Kuwamoto, *Inorg. Chem.*, 1985, **24**, 2697-2701.
12. P.A. Stabnikov, S.V. Sysoev, N.S. Vanina, S.V. Trubin, P.P. Semyannikov and I.K. Igumenov, The electronic journal "INVESTIGATED IN RUSSIA", 2001, <http://zhurnal.ape.relarn.rsu.ru/articles/2001/023.pdf> (in Russian).
13. M.M. Conradie, J. Conradie and E. Erasmus, *Polyhedron*, 2014, **79**, 52-59.
14. V.N. Naumov, G.I. Frolova, M.A. Bespyatov, N.A. Nemov, P.A. Stabnikov and I.K. Igumenov, *Thermochim. Acta*, 2005, **436**, 135-139
15. K. Ueno, H. Kaneko and Y. Watanabe, *Microchem. J.*, 1966, **10**, 244-249.
16. E.W. Berg and J.T. Truemper, *J. Phys. Chem.*, 1960, **64**, 487-490.
17. R.P. Foss, D.O. Cowan and G.S. Hammond, *J. Phys. Chem.*, 1964, **68**, 3747-3752.
18. H.R. Brunner and B.J. Curtis, *J. Therm. Anal.*, 1973, **5**, 111-115.
19. M.A. Bespyatov, V.N. Naumov, *Thermochim. Acta*, 2007, **463**, 90-92.
20. C. Gobble, J. Chickos, S. P. Verevkin, *J. Chem. Eng. Data*, 2014, **59**, 1353-1365
21. S.P. Verevkin, M.E. Konnova, K.V. Zherikova and A.A. Pimerzin, *Fluid Phase Equilib.*, 2020, **510**, 112503
22. M.V. Roux, M. Temprado, J.S. Chickos and Y. Nagano, *J. Phys. Chem. Ref. Data*, 2008, **37**, 1855-1996
23. V. Majer and V. Svoboda and H.V. Kehiaian, *Enthalpies of Vaporization of Organic Compounds: A Critical Review and Data Compilation*, Blackwell Scientific Publications, Oxford, 1985.

24. Dz.H. Zaitsau, V.N. Emel'yanenko, A.A. Pimerzin, S.P. Verevkina, *J. Chem. Thermodyn.*, 2018, **122**, 1-12.
25. S.P. Verevkin, S.A. Kozlova, V.N. Emel'yanenko, P. Goodrich, C. Hardacre, *J. Phys. Chem. A*, 2008, **112**, 11273-82.
26. Zherikova and S.P. Verevkin, *Fluid Phase Equilib.*, 2018, **472**, 196-203.
27. C. Yin,; W. Liu, Z. Li, Z. Pan, T. Lin, M. Zhang, *J. Sep. Sci.*, 2001, **24**, 213-220.
28. E. Kovats, *Helv. Chim. Acta*, 1958, **41**, 1915–1932.
29. S.P. Verevkin, *J. Chem. Thermodyn.*, 2006, **38**, 1111–1123.
